# Supplementary material for: Downregulation of Mitochondrial Fusion Protein Expression Affords Protection from Canonical Necroptosis in H9c2 Cardiomyoblasts
Source: MDPI journal article supplement (doi:10.3390/ijms25052905), 2024-03-02
Supplement: s1 [file s1]

Supplemental Figures

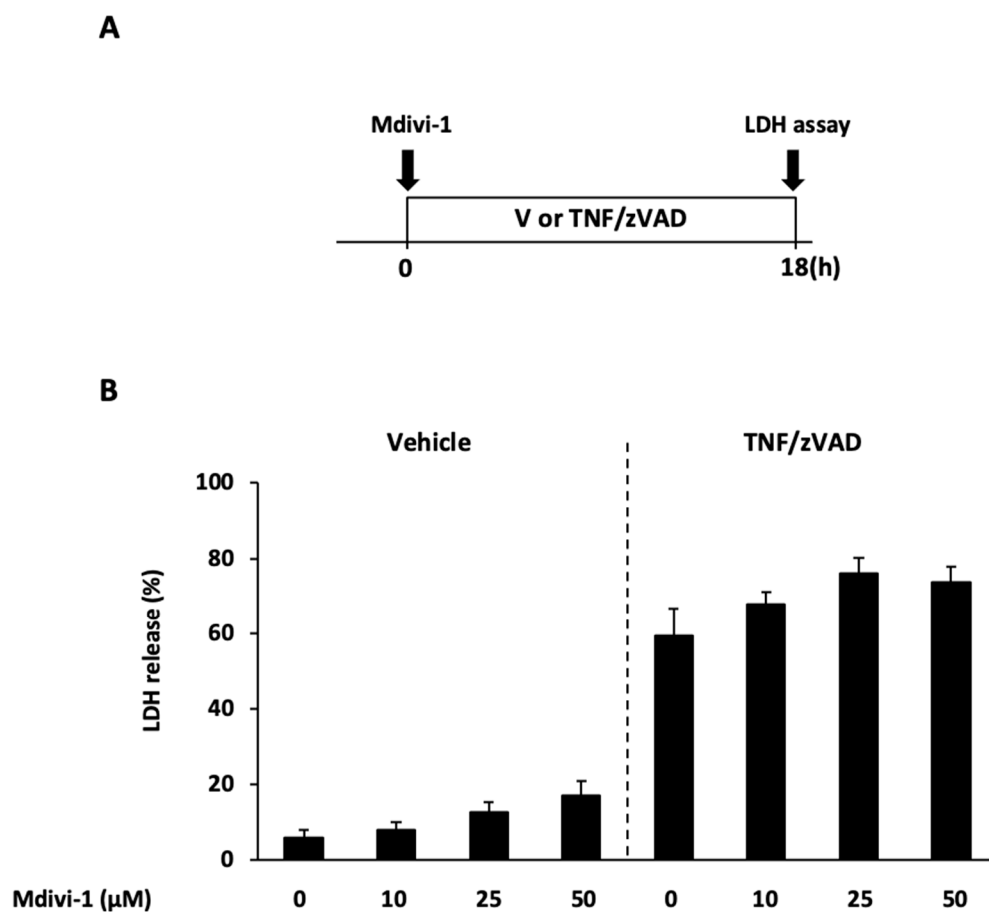

**Figure S1.** (A, B) Effects of Mdivi-1, a Drp1 inhibitor, on TNF/zVAD-induced LDH release. Experimental protocol (A) and results of quantitative analyses (B) are shown. H9c2 cells were treated with vehicle or various concentration of Mdivi-1 at the same time as the addition of vehicle or TNF- $\alpha$  and zVAD (TNF/zVAD; TNF- $\alpha$ , 50 ng/ml; zVAD, 20  $\mu$ M). .

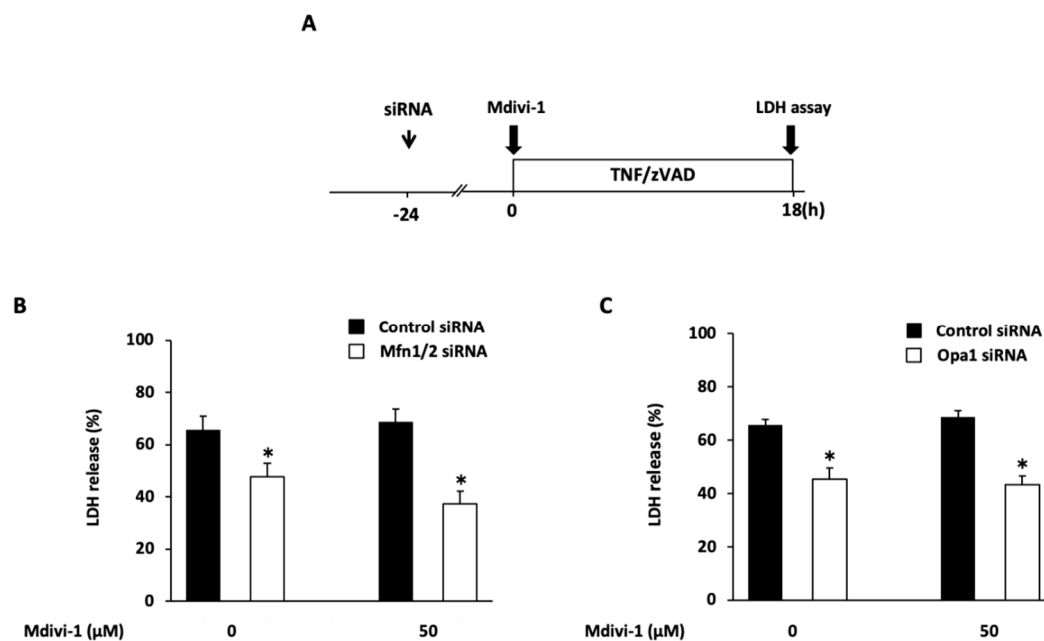

**Figure S2.** (A–C) Effects of Mdivi-1, a Drp1 inhibitor, on protection from TNF/zVAD-induced cell death by knockdown of Mfn1/2 and Opa1. Experimental protocol (A) and results of quantitative analyses (B and C) are shown. The siRNAs were transfected into H9c2 cells 24 h before the addition of TNF- $\alpha$  and zVAD (TNF/zVAD; TNF- $\alpha$ , 50 ng/ml; zVAD, 20  $\mu$ M). Mfn1/2 = mitofusin 1/2, Opa1 = optic atrophy-1. N = 4 in each group. \*p<0.05 vs. cells transfected with control siRNA. .

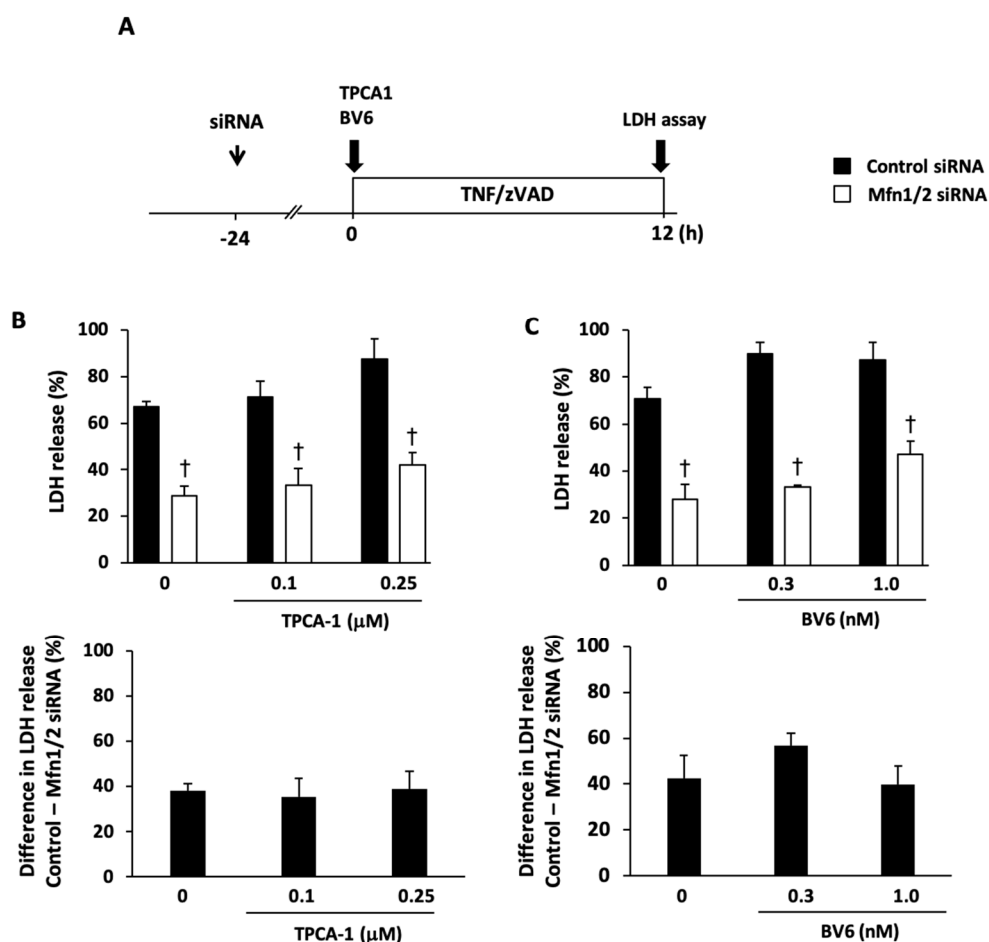

**Figure S3.** (A, B) Effects of TPCA-1, an IKK $\alpha/\beta$  inhibitor, and BV6, an inhibitor of cellular inhibitor of apoptosis proteins 1, on protection from TNF/zVAD-induced cell death by knockdown of mitochondrial fusion-regulating proteins. Experimental protocol (A) and results of quantitative analyses (B and C) are shown. The siRNAs were transfected into H9c2 cells 24 h before the addition of TNF- $\alpha$  and zVAD (TNF/zVAD; TNF- $\alpha$ , 50 ng/ml; zVAD, 20  $\mu$ M). Mfn1/2 = mitofusin 1/2, Opa1 = optic atrophy-1. N = 6 in each group. †p<0.05 vs cells transfected with control siRNA and treated with similar concentration of inhibitors.

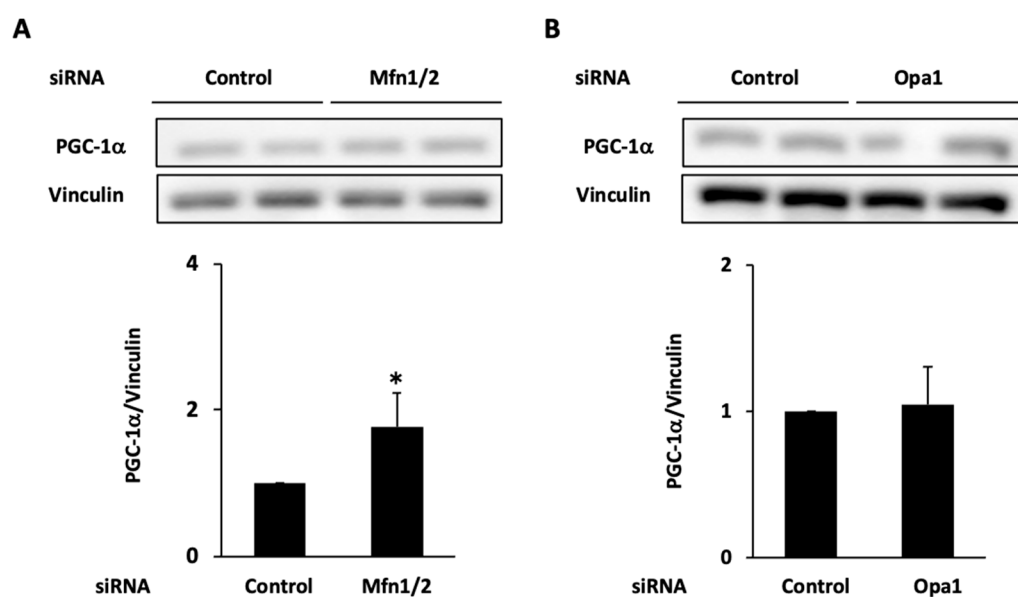

**Figure S4.** (A, B) Effects of knockdown of mitofusin (Mfn) 1/2 (A) and optic atrophy-1 (Opa1, B) on levels of peroxisome proliferator-activated receptor gamma coactivator-1  $\alpha$  (PGC-1 $\alpha$ ). Representative Western blots and results of densitometric analyses are shown. The siRNAs were transfected into H9c2 cells and cell lysates were collected 24 h after the transfection of siRNAs. N = 4 in each group. \* $p < 0.05$  vs. cells transfected with control siRNA.
